# Supplementary material for: Distinct Roles of Additives in the Improved Sensitivity to CO of Ag- and Pd-Modified Nanosized LaFeO3
Source: MDPI journal article supplement (doi:10.3390/chemosensors11010060), 2023-01-13
Supplement: s1 [file s1]

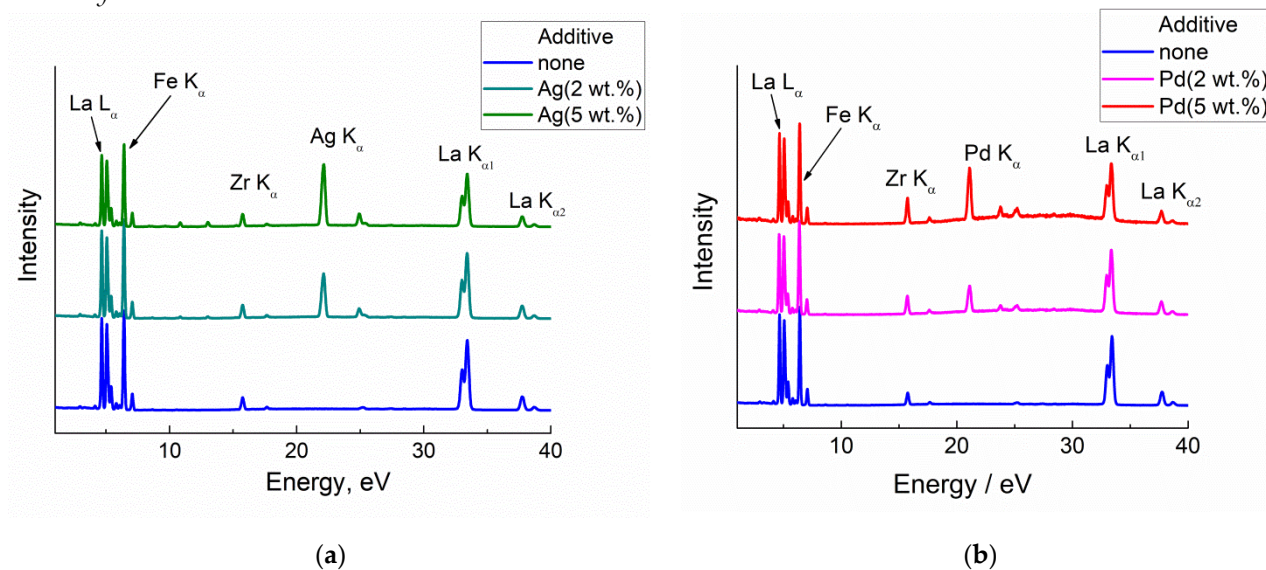

**Figure S1.** X-ray fluorescence spectra of pristine  $\text{LaFeO}_3$  and Ag-modified  $\text{LaFeO}_3$  (a), and Pd-modified  $\text{LaFeO}_3$  (b). Peaks of Zr correspond to anode of X-ray emitter tube.

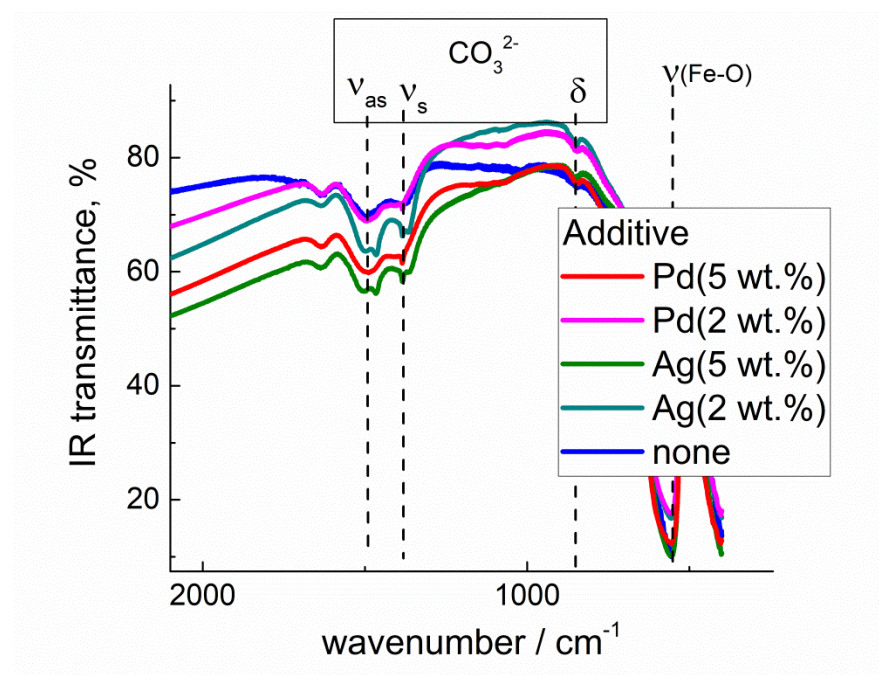

**Figure S2.** Enlarged FTIR spectra of the materials as in Figure 4 in the main text.
